# Supplementary material
Source: publisher figshare collection journal article supplement (https://frontiersin.figshare.com/ndownloader/files/14364950)
Supplement: Supplementary file [file 14364950]

Table S5. Relative abundance of bacterial taxa based on 16S *rRNA* gene sequencing in vaginal samples obtained from postmenopausal women with hormone replacement therapy (POST+HT).

| Taxon name                     | Subject |       |       |       |       |       |       |       |       |       |       |        |       |       |       |
|--------------------------------|---------|-------|-------|-------|-------|-------|-------|-------|-------|-------|-------|--------|-------|-------|-------|
|                                | 1018    | 1040  | 1041  | 1042  | 1043  | 1044  | 1045  | 1046  | 1047  | 1051  | 1052  | 1054   | 1055  | 1056  | 1057  |
| <i>Aerococcus</i>              | 0.00    | 0.00  | 0.12  | 0.00  | 0.00  | 0.00  | 0.00  | 0.00  | 0.00  | 0.00  | 0.00  | 0.00   | 0.00  | 0.00  | 0.00  |
| <i>Atopobium</i>               | 0.00    | 0.00  | 0.00  | 0.00  | 0.32  | 0.00  | 0.00  | 0.10  | 0.00  | 0.00  | 0.00  | 0.00   | 0.00  | 0.00  | 0.00  |
| <i>Bifidobacterium</i>         | 0.00    | 0.00  | 0.73  | 0.00  | 0.00  | 0.00  | 0.00  | 0.00  | 0.00  | 0.00  | 0.00  | 0.00   | 0.00  | 0.00  | 0.78  |
| <i>Finegoldia</i>              | 0.00    | 0.00  | 0.00  | 0.02  | 0.01  | 0.00  | 0.00  | 0.00  | 0.00  | 0.00  | 0.00  | 0.00   | 0.00  | 0.00  | 0.00  |
| <i>Gardnerella</i>             | 1.00    | 0.64  | 0.00  | 0.00  | 0.00  | 0.00  | 0.00  | 0.85  | 0.00  | 0.00  | 0.00  | 0.00   | 0.00  | 0.00  | 0.00  |
| <i>Lactobacillus</i>           | 0.00    | 0.02  | 0.02  | 0.04  | 0.03  | 0.04  | 0.04  | 0.00  | 0.06  | 0.04  | 0.04  | 0.04   | 0.09  | 0.04  | 0.00  |
| <i>Lactobacillus crispatus</i> | 0.00    | 0.00  | 0.00  | 0.85  | 0.00  | 0.95  | 0.91  | 0.00  | 0.73  | 0.94  | 0.95  | 0.93   | 0.00  | 0.94  | 0.00  |
| <i>Lactobacillus gasseri</i>   | 0.00    | 0.00  | 0.00  | 0.00  | 0.50  | 0.00  | 0.02  | 0.00  | 0.00  | 0.00  | 0.00  | 0.00   | 0.00  | 0.00  | 0.00  |
| <i>Lactobacillus iners</i>     | 0.00    | 0.32  | 0.00  | 0.00  | 0.00  | 0.00  | 0.00  | 0.00  | 0.16  | 0.00  | 0.00  | 0.00   | 0.71  | 0.00  | 0.00  |
| <i>Lactobacillus jensenii</i>  | 0.00    | 0.00  | 0.00  | 0.00  | 0.00  | 0.00  | 0.00  | 0.00  | 0.00  | 0.00  | 0.00  | 0.00   | 0.18  | 0.00  | 0.00  |
| <i>Lactobacillus vaginalis</i> | 0.00    | 0.00  | 0.10  | 0.00  | 0.00  | 0.00  | 0.00  | 0.00  | 0.00  | 0.00  | 0.00  | 0.00   | 0.00  | 0.00  | 0.00  |
| <i>Prevotella</i>              | 0.00    | 0.00  | 0.00  | 0.02  | 0.04  | 0.00  | 0.00  | 0.01  | 0.02  | 0.00  | 0.00  | 0.00   | 0.00  | 0.00  | 0.00  |
| <i>Staphylococcus</i>          | 0.00    | 0.00  | 0.00  | 0.00  | 0.00  | 0.00  | 0.00  | 0.00  | 0.00  | 0.00  | 0.00  | 0.00   | 0.00  | 0.00  | 0.19  |
| Other                          | 0.00    | 0.03  | 0.03  | 0.07  | 0.09  | 0.01  | 0.03  | 0.04  | 0.03  | 0.02  | 0.01  | 0.02   | 0.02  | 0.01  | 0.03  |
| TOTAL READS                    | 73275   | 30320 | 54477 | 53657 | 42931 | 71710 | 41645 | 45863 | 39486 | 61873 | 71892 | 105331 | 71339 | 38923 | 40153 |

Table includes taxa present with at least 1% abundance in two or more samples or with at least 5% abundance in one sample.  
Taxa identified in the samples at low levels (< 1% abundance) are aggregated into category: "Other"
